# Supplementary material
Source: PubMed Central journal article supplement (PMC4175087)
Supplement: NIHMS616569-supplement-08.pdf [file NIHMS616569-supplement-08.pdf]

534 **Supplementary Figure legends**

535 **Supplementary Fig. S1.** Immunohistochemistry of FGLamide related allatostatin  
536 (FGLa/AST) neuropeptide in an *Ixodes scapularis* unfed female synganglion. Both dorsal  
537 (A) and ventral sides (B) are shown. For the naming of peptidergic neurons a nomenclature  
538 system previously used for the hard tick *Rhipicephalus appendiculatus* (Šimo et al., 2009)  
539 has been followed. The first two letters of each name refer to the position of each neuron in  
540 a specific lobe of the synganglion, specifically cheliceral (Ch), protocerebral (Pc), pedal 1-4  
541 (Pd1-4), opisthosomal (Os), or postesophageal (Po). The letters that follow the first two  
542 letters of each name refer to the anatomical location of the neuron, specifically dorsal (D),  
543 ventral (V), anterior (A), posterior (P), medial (M) or lateral (L). Neurons that innervate the  
544 hindgut were labeled as HG. An unidentified number of four pairs of dorsal opisthosomal  
545 neurons (OsDM<sub>1-4</sub>) in A (red square) is/are likely the source (OsHG) of the rectal sac  
546 innervation. The specific location of three pairs of ventral neurons in B (red square) has not  
547 been determined. These neurons may be located in stomodeal or first pedal lobe. Scale bar  
548 = 50 µm.

549 **Reference**

550 Šimo, L., Slovak, M., Park, Y., Žitňan, D., 2009a. Identification of a complex peptidergic  
551 neuroendocrine network in the hard tick, *Rhipicephalus appendiculatus*. *Cell Tissue Res*  
552 335, 639 - 655.

553

554 **Supplementary Fig. S2.** Amino acid sequences of four different classes of neuropeptides  
555 (FGLa/AST, FGLamide related allatostatin; MIP, myoinhibitory peptide; SIFamide; orcokinin)  
556 from *Ixodes scapularis*. Each group is encoded by a single gene. The underlined peptides

557 were found in the current MALDI analyses. The “a” at the C-termini are for putative  
558 amidation; double dot on the N- terminus indicates an unknown cleavage site. For the full  
559 neuropeptide precursor sequences see Christie (2008), Donohue et al. (2010) and Šimo et  
560 al. (2009b).

## 561 References

- 562 Christie, A.E., 2008. Neuropeptide discovery in Ixodoidea: an in silico investigation using  
563 publicly accessible expressed sequence tags. *Gen Comp Endocrinol* 157, 174 - 185.
- 564 Donohue, K.V., Khalil, S.M., Ross, E., Grozinger, C.M., Sonenshine, D.E., Michael Roe, R.,  
565 2010. Neuropeptide signaling sequences identified by pyrosequencing of the American  
566 dog tick synganglion transcriptome during blood feeding and reproduction. *Insect*  
567 *Biochem Mol Biol* 40, 79 - 90.
- 568 Šimo, L., Slovak, M., Park, Y., Žitňan, D., 2009a. Identification of a complex peptidergic  
569 neuroendocrine network in the hard tick, *Rhipicephalus appendiculatus*. *Cell Tissue Res*  
570 335, 639 - 655.

571

572 **Supplementary Fig. S3.** Alignments of the predicted translations of the four *Ixodes*  
573 *scapularis* FGLamide related allatostatin receptors (FGLa/AST-R1 - 4) with other  
574 FGLa/AST-R related sequences from *Periplaneta americana* (GenBank **AAK52473.1**) and  
575 *Bombyx mori* (GenBank **AF303368.1**). The letters highlighted with a gray background are  
576 similar, and the letters highlighted with a black background are identical amino acids in a  
577 50% majority rule. Seven conserved transmembrane segments (TM1-7) of putative  
578 FGLa/AST-R1 - 4 (red letters) were predicted using the HMMTOP Server v2.0 software  
579 (<http://www.enzim.hu/hmmtop/>).

580

581

582 **Supplementary Fig. S4.** Phylogenetic relationship of *Ixodes scapularis* FGLamide related  
583 allatostatin receptors 1 – 4 (FGLa/AST-R 1 - 4) with FGLA/AST-Rs of various insect  
584 species. The tree was constructed using a neighbor-joining method. The number at each  
585 node indicates the percentage of support from 500 bootstrap replicates. The *Drosophila*  
586 *melanogaster* neuropeptide F receptor (NPF-R) sequence (AF364400.1) was used as the  
587 out-group for the analysis. GenBank Accession numbers are: *I. scapularis* FGLa/AST-R1  
588 XP\_002433372.1; *I. scapularis* FGLa/AST-R2 XP\_002403852.1; *I. scapularis* FGLa/AST-R3  
589 XP\_002433373.1; *I. scapularis* XP\_002414997.1; *Drosophila melanogaster* FGLa/AST-R  
590 AAF05299.1; *Periplaneta americana* FGLa/AST-R AAK52473.1. ,.

591

592 **Supplementary Fig. S5.** Potentiation of spontaneous hindgut movement by SIFamide.  
593 Note that only a small number showed spontaneous movement among the high number of  
594 tested hindguts when incubated in dissection buffer. In those hindguts, SIFamide clearly  
595 potentiated the frequency of spontaneous hindgut movement.

596

597 **Supplementary Movie S1.** Selected video sequence of SIFamide–stimulated *Ixodes*  
598 *scapularis* hindgut motility, when applied at 1  $\mu$ M concentration.
